# Supplementary material for: Two-dimensional magnetic colloids under shear
Source: Royal Society of Chemistry journal article supplement (doi:10.1039/c6sm00023a), 2016-01-01
Supplement: c6sm00023a1.pdf [file c6sm00023a1.pdf]

# Two-dimensional magnetic colloids under shear

## Supplementary Information

Tomaž Mohorič,<sup>1,2</sup> Jure Dobnikar,<sup>1</sup> and Jürgen Horbach<sup>3</sup>

<sup>1</sup>*International Research Centre for Soft Matter,  
Beijing University of Chemical Technology, Beijing 100029, P.R. China*

<sup>2</sup>*Faculty of Chemistry and Chemical Technology,  
University of Ljubljana, Večna pot 113, 1000 Ljubljana, Slovenia*

<sup>3</sup>*Institute for Theoretical Physics II: Soft Matter,  
Heinrich-Heine-Universität Düsseldorf, 40225 Düsseldorf, Germany*

## I. BONDING PATTERNS IN DEFORMED GEL

Bonding patterns in a gel (at the opening angle  $\theta = 48^\circ$ ) are more quantitatively characterized on Figure S1. We define two colloids as bonded if their interparticle distance is less than  $1.2\sigma$ .

First, on Figure S1A we present bonding probability distribution  $P_n$ , i.e. probability that a colloid forms exactly  $n$  bonds, for the unsheared system ( $\dot{\gamma} = 0$ ). As could be deduced from the snapshots (see Figure 3 in the main text), most of the particles form 2 or 3 bonds and there is also non-negligible fraction of non-bonded particles.

Figure S1B shows changes in the bonding distribution,  $\Delta P_n$ , at different strains for the lowest (black dashes) and the highest (red crosses) shear rate. Left part of the figure presents  $\Delta P_n$  for the system's bulk ( $y \approx 0$ ) and right part for the boundaries ( $y \approx \pm L/2$ ). For the highest  $\dot{\gamma}$  there are hardly any changes in bulk  $P_n$ . On the other hand at the boundaries, there are significant changes in  $P_n$  already at  $\gamma = 0.1$ , where the fraction of single-bonded particles ( $n = 1$ , free ends of chains) increases on the account of three-bonded "bridges" ( $n = 3$ ). Initially, after the shear is applied, these "bridges" are the weak-points, where the bond breakage mainly occurs. In later stages, non-bonded particles ( $n = 0$ ) incorporate into the network, as suggested by the drop in  $P_0$  and increase in  $P_2$ . For the lowest shear rate  $\Delta P_n$  for the bulk and boundary look very similar. A fraction of non-bonded particles ( $n = 0$ ) incorporates into the network, which results in an increase of three- ( $n = 3$ ) and four-bonded ( $n = 4$ ) particles. At  $\gamma = 10$  almost all non-bonded particles are incorporated into the network. However, in the bulk this results in almost equal increase of  $P_2$ ,  $P_3$  and  $P_4$ , while at the boundaries only  $P_2$  increases.

To determine average bond orientation we calculated bonding anisotropy, defined as  $\varepsilon_{\text{bond}} = \langle u_y^2 \rangle / \langle u_x^2 \rangle$ . Here  $u_x$  and  $u_y$  are  $x$  and  $y$ -component of the unit vector connecting centers of two bonded particles. Note that for a uniformly distributed bond orientation bonding anisotropy is 1.  $\varepsilon_{\text{bond}}$  as a function of coordinate  $y$  at different strains for the lowest (black circles) and the highest (red squares) shear rate is presented on Figure S1C. At  $\gamma = 0.1$  (top row) bonding anisotropy equals 1 independently of the shear rate. At  $\gamma = 1$ , when stress reaches the maximum for  $\dot{\gamma} = 10^{-5}$ , bonding anisotropy is about 0.8 and uniformly distributed. This clearly shows the tendency of the network to align its bonds with direction of the applied shear. With a further increase in strain, deviation from an isotropic

bond orientation becomes even more pronounced. On the other hand, for the highest  $\dot{\gamma}$  only bonds at the boundaries ( $y \approx \pm L/2$ ), where shear is applied, tend to align with the shearing field.

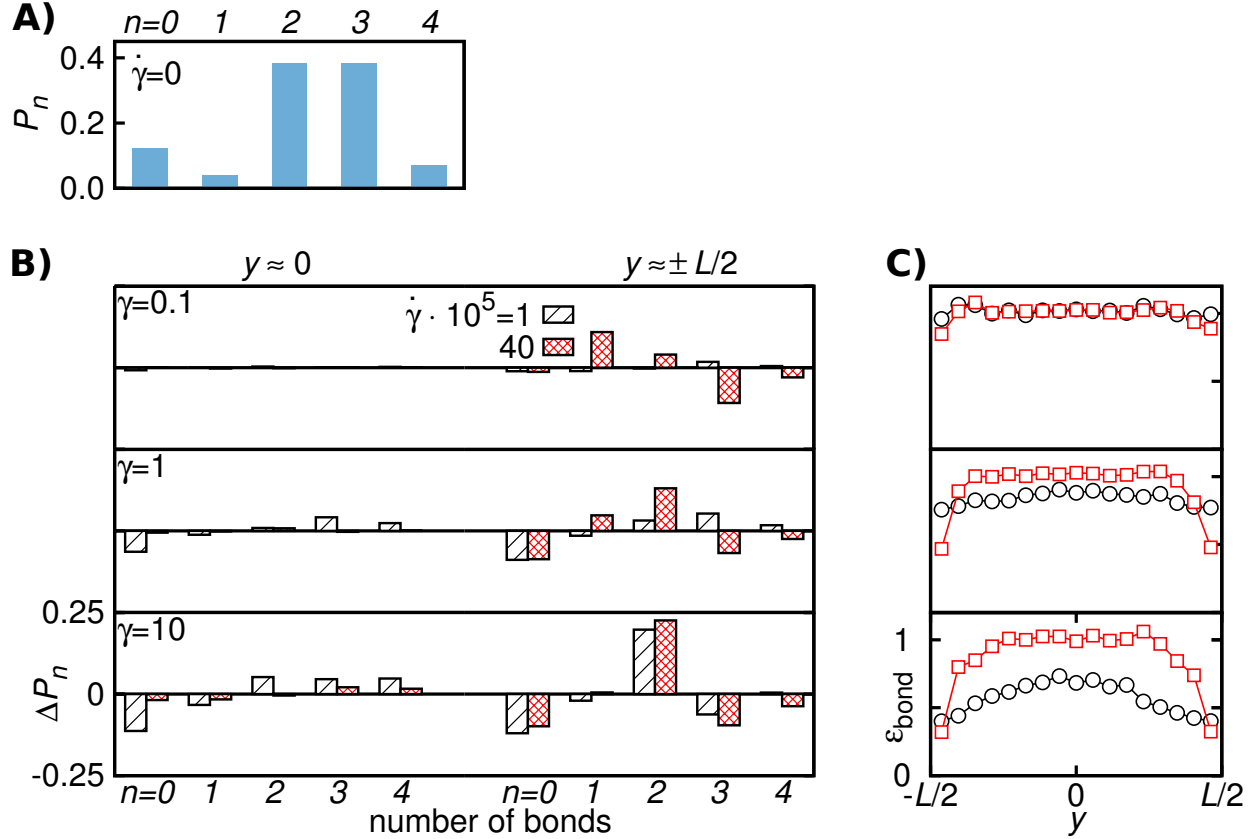

FIG. S1. **A)** Bonding distribution,  $P_n$ , for the unsheared network ( $\dot{\gamma} = 0$ ) for the case of the opening angle  $\theta = 48^\circ$ . **B)** Changes in bonding distribution,  $\Delta P_n$ , at strain  $\gamma=0.1$  (top row), 1 (middle row), and 10 (bottom row) for the lowest (black) and the highest (red) shear rate  $\dot{\gamma}$ . The left half presents  $\Delta P_n$  in the center of simulation box ( $y \approx 0$ ), while the right half shows the same but for the borders ( $y \approx \pm L/2$ ). **C)** Bonding anisotropy  $\varepsilon_{\text{bond}}$  as a function of  $y$  at strain  $\gamma=0.1$  (top row), 1 (middle row), and 10 (bottom row) for the lowest (black circles) and the highest (red squares) shear rate  $\dot{\gamma}$ .

## II. GEL RELAXATION AFTER SWITCHING OFF THE SHEAR

To further investigate the stability of deformed gel structures ( $\dot{\gamma} = 10^{-5}$ ), we switched off the shear at various points in stress-strain curves and monitored the subsequent relaxation

of stress. Figure S2 (left) shows the stress–time relation after switching off the shear at strain values  $\gamma = 0.1$  (black), 1 (blue), 10 (green) and 30 (red). In all the cases the stress decreases somewhat towards  $\sigma_{xy} = 0$ . Surprisingly, even for the relaxation from  $\gamma = 0.1$ , where shear–induced structural changes are relatively small,  $\sigma_{xy}$  remains almost unchanged. Accordingly, only minor structural changes are observed. This suggests that the gel structure at every point in the stress–strain curve is effectively trapped in a deep local energy minimum. By increasing the reduced temperature  $T^*$  by a factor of 10 (which would correspond to decreasing the external field in experiment from  $B_0 \approx 10$  mT to  $B_0 \approx 3$  mT) we effectively decreased the energetic barriers. Stress–time relations at these conditions are plotted on Figure S2 (right). Stress relaxation towards its equilibrium value ( $\sigma_{xy} = 0$ ) is much more complete at elevated temperature. Hence, the ability of the system to store a given stress decreases with temperature.

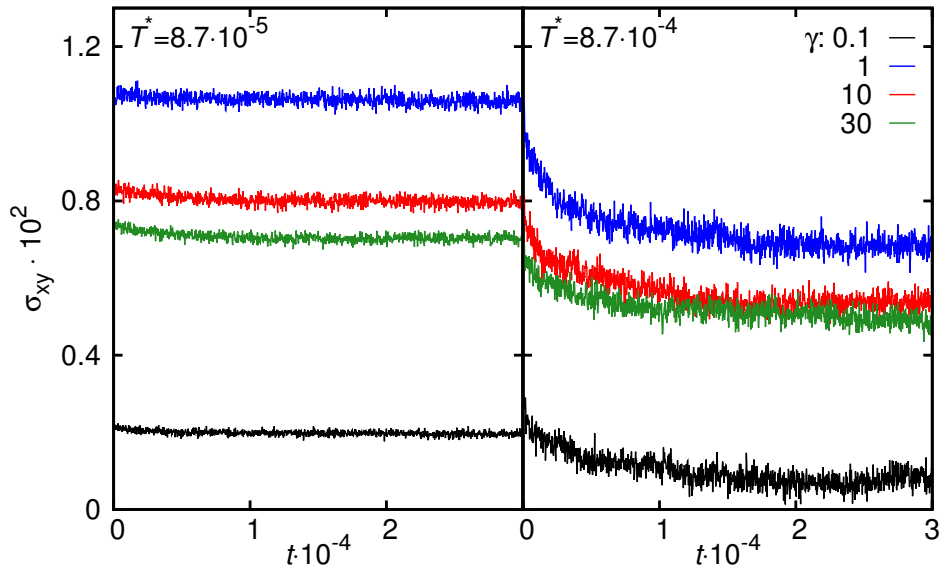

FIG. S2. Stress–time relation after switching off the shear at different strains  $\gamma$  (colors) and at temperatures  $T^* = 8.7 \cdot 10^{-5}$  (left) and  $T^* = 8.7 \cdot 10^{-4}$  (right).

### III. MOVIES OF FULL TRAJECTORIES

We have prepared movies of trajectories and corresponding stress–strain curves in the form of .gif files for the lowest and the highest shear rate  $\dot{\gamma}$  at each opening angle  $\theta$ . The name of the file is composed from values of the opening angle and the shear rate.

Particles in the simulated cell are depicted with dark-gray color, while periodic images in  $y$ -direction are shown in light-gray. For the opening angle  $\theta = 0^\circ$  also 5 and 7-fold disclinations are shown with blue and red.

List of files:

- `theta_0_shear_0.00001.gif`
- `theta_0_shear_0.0004.gif`
- `theta_48_shear_0.00001.gif`
- `theta_48_shear_0.0004.gif`
- `theta_50_shear_0.00001.gif`
- `theta_50_shear_0.0004.gif`
